# Supplementary material for: NIR laser-responsive liquid metal-loaded polymeric hydrogels for controlled release of doxorubicin
Source: Royal Society of Chemistry journal article supplement (doi:10.1039/c9ra02286d), 2019-01-01
Supplement: c9ra02286d1.pdf [file c9ra02286d1.pdf]

## Supporting information

### NIR laser-responsive liquid metal-loaded polymeric hydrogels for controlled release of doxorubicin

Linlin Fan<sup>a</sup>, Xuyang Sun<sup>b</sup>, Xuelin Wang<sup>a</sup>, Hongzhang Wang<sup>a</sup> and Jing Liu<sup>\*a,b</sup>

<sup>a</sup>Department of Biomedical Engineering, School of Medicine, Tsinghua University, Beijing 100084, China.

<sup>b</sup>Technical Institute of Physics and Chemistry, Chinese Academy of Sciences, Beijing 100190, China.

\*Corresponding authors. E-mail: jliubme@tsinghua.edu.cn

The volume change ratios ( $V_T/V_0$ ) were calculated by the equation  $V_T/V_0 = (d_T/d_R)^3$ , where  $d_T$  is the diameter of hydrogel at temperature T, and  $d_R$  is the diameter of hydrogel at room temperature.

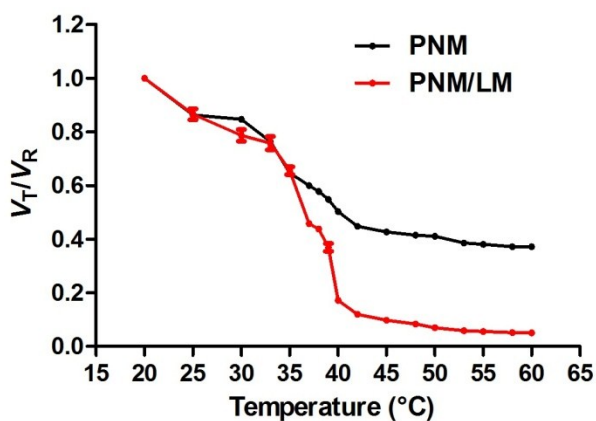

Fig. S1 Volume changes of PNM and PNM/LM at different temperatures.

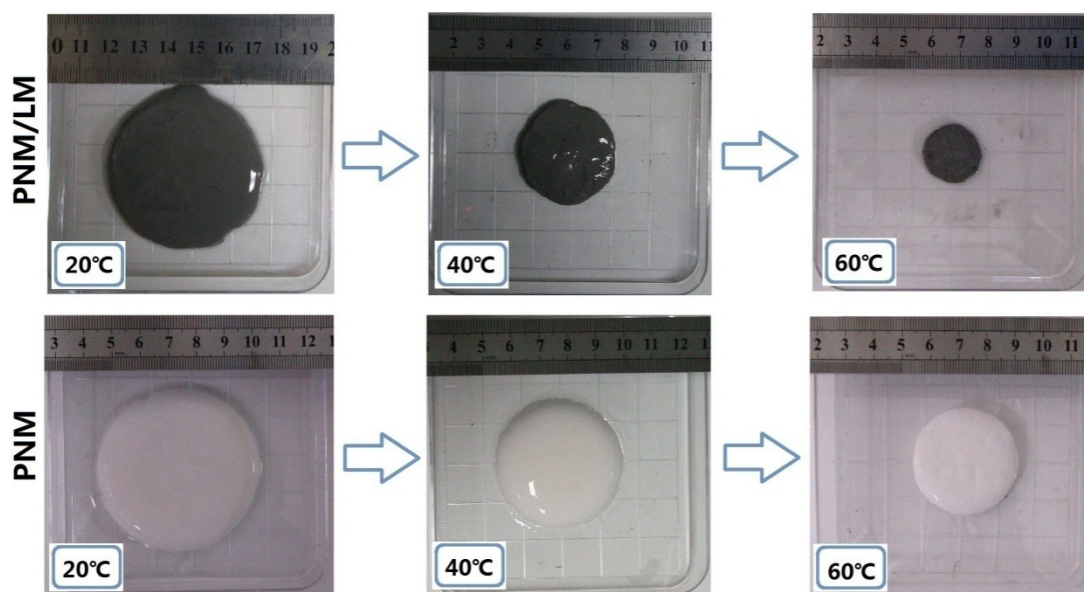

Fig. S2 Photograph of PNM/LM and PNM at different temperatures.

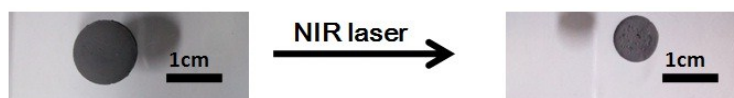

Fig. S3 Volume changes of PNM/LM under NIR laser irradiation.

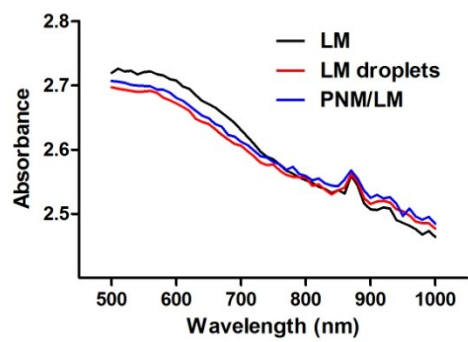

Fig. S4 UV-visible-NIR absorbance spectrum of bulk LM, LM droplets and PNM/LM.
